# Supplementary material
Source: Springer Nature journal article supplement (https://www.springermedizin.de/resource/supplementary/12882_2004_34_MOESM2_ESM.pdf/9454812)

# g t t d 2

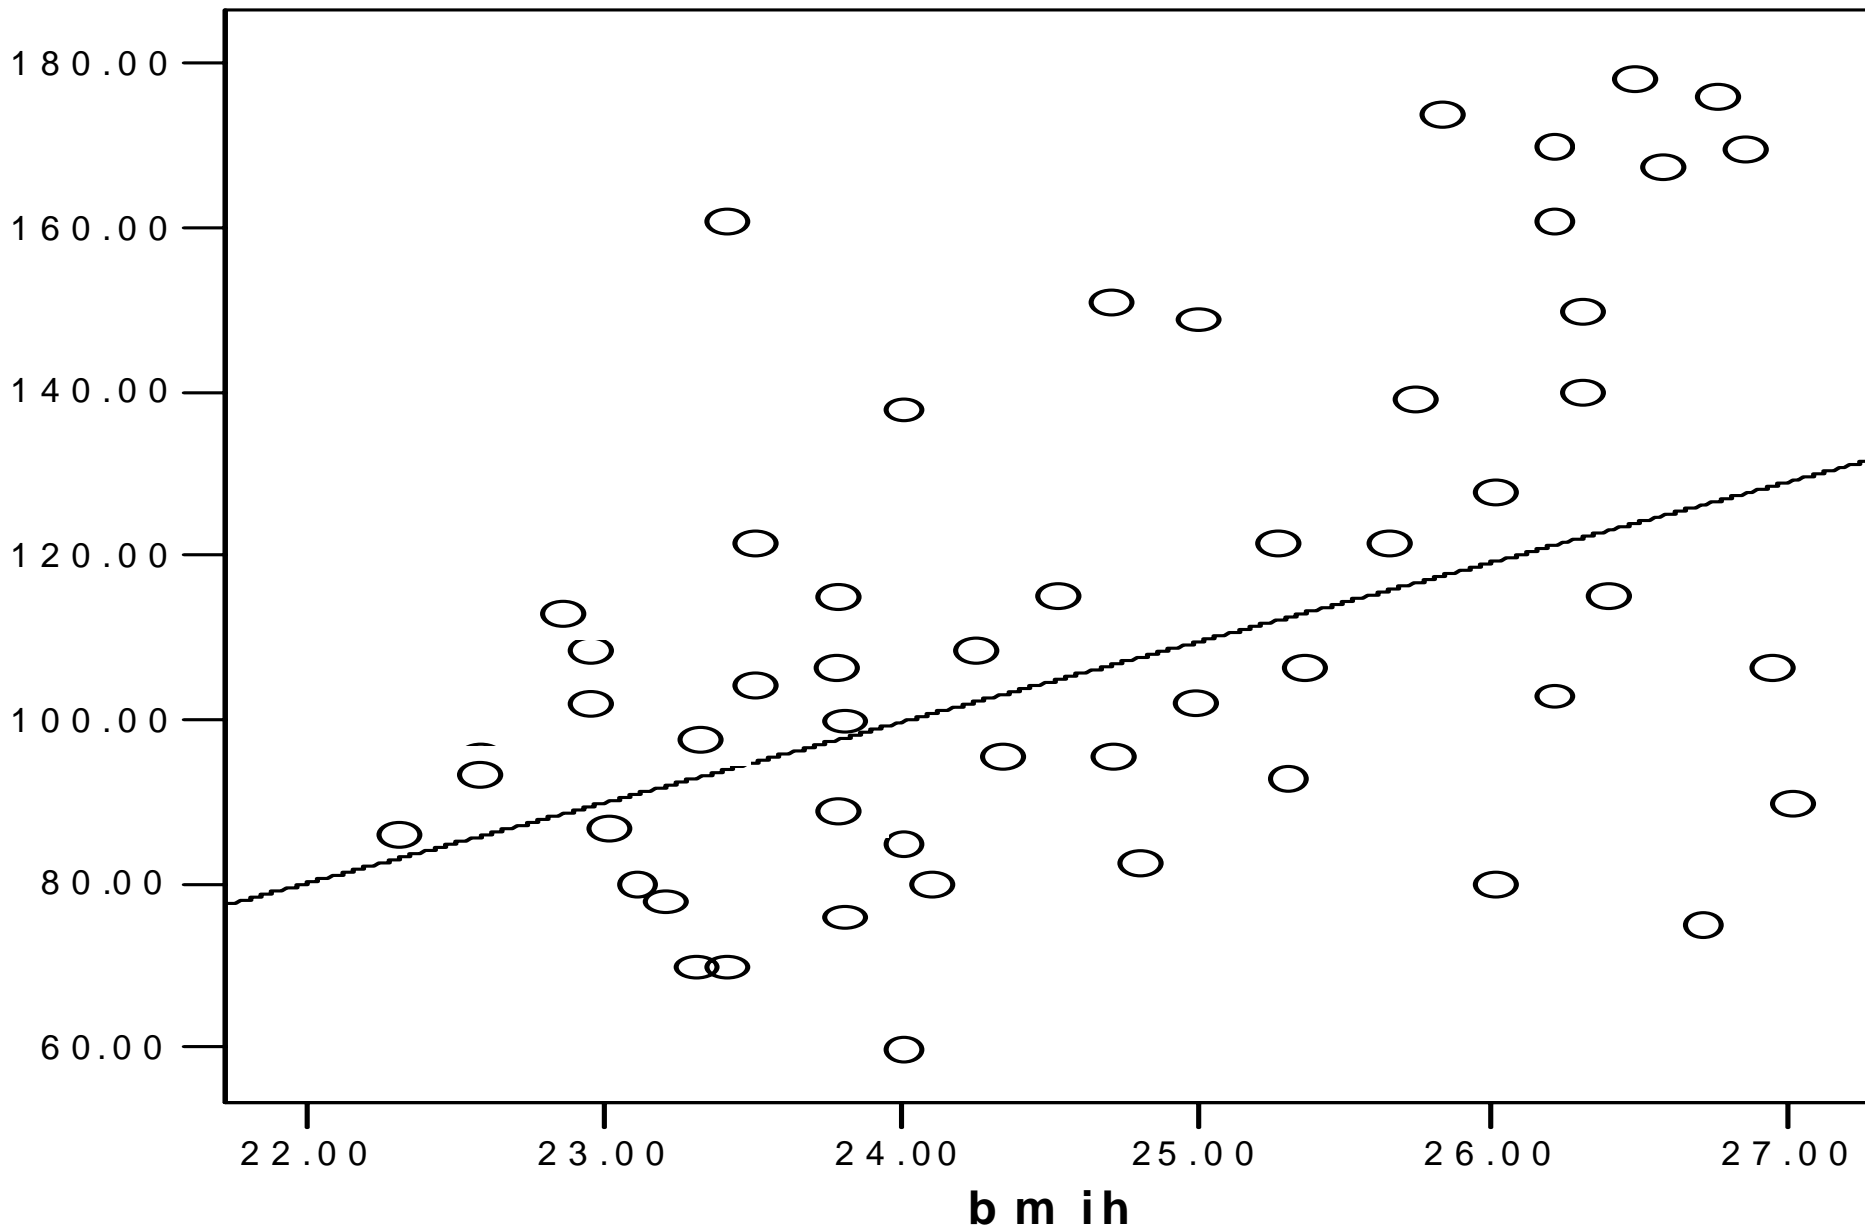

Supplement: MOESM2 [file 9454812]
